# Supplementary material
Source: MDPI journal article supplement (https://www.mdpi.com/2079-3197/10/10/186)
Supplement: s1 [file s1]

**Table S1.** The Complete Dataset of the Moon sight visibility

| C | H. Y. | M. | Sight Date | Best Time | Lat   | Lon    | Age   | W    | ARCL | ARCV | DAZ  | SO   | A |
|---|-------|----|------------|-----------|-------|--------|-------|------|------|------|------|------|---|
| O | 1423  | 10 | 2002-12-04 | 14:50:48  | 30.9  | 35.8   | 7.26  | 0.03 | 3.31 | 1.6  | 2.9  | I    | I |
| O | 1419  | 11 | 1999-02-16 | 15:03:05  | 33.3  | 44.4   | 8.39  | 0.03 | 3.42 | 2.94 | 1.75 | I    | I |
| O | 1422  | 9  | 2001-11-15 | 13:51:06  | 24.3  | 54.3   | 7.17  | 0.03 | 3.43 | 3.42 | 0.34 | I    | I |
| O | 1422  | 9  | 2001-11-15 | 14:53:13  | 31.9  | 35.8   | 8.2   | 0.04 | 3.92 | 3.68 | 1.36 | I    | I |
| O | 1425  | 4  | 2004-05-19 | 15:51:47  | 29.4  | 48     | 10.98 | 0.05 | 4.26 | 4.26 | 0.13 | I    | I |
| O | 1422  | 7  | 2001-09-17 | 13:17:52  | 4.1   | 73.3   | 2.83  | 0.05 | 4.3  | 2.62 | 3.4  | I    | I |
| O | 1423  | 10 | 2002-12-04 | 17:11:31  | 10.3  | 9.8    | 9.6   | 0.05 | 4.33 | 3.71 | 2.23 | I    | I |
| O | 1422  | 7  | 2001-09-17 | 14:56:28  | 26.6  | 50     | 4.47  | 0.06 | 4.38 | 4.25 | 1.09 | I    | I |
| O | 1423  | 10 | 2002-12-04 | 17:43:19  | 6.5   | 3.4    | 10.13 | 0.06 | 4.59 | 4.14 | 1.99 | I    | I |
| S | 1404  | 4  | 1984-01-03 | 15:32:55  | 15.6  | 35.6   | 10.27 | 0.05 | 4.64 | 3.23 | 3.33 | I    | I |
| O | 1421  | 12 | 2001-02-23 | 17:45:36  | -33.9 | 18.4   | 9.39  | 0.06 | 4.89 | 4.73 | 1.24 | I    | I |
| O | 1422  | 9  | 2001-11-15 | 17:08:33  | 10.3  | 9.8    | 10.46 | 0.06 | 4.9  | 4.9  | 0.02 | I    | I |
| O | 1425  | 3  | 2004-04-20 | 02:12:27  | 32.4  | -111   | 12.84 | 0.06 | 4.96 | 4.63 | 1.77 | I    | I |
| S | 1340  | 9  | 1922-04-27 | 16:25:49  | -33.9 | 18.5   | 11.37 | 0.07 | 5.09 | 4.44 | 2.49 | I    | I |
| O | 1425  | 12 | 2005-01-10 | 17:36:39  | 11.2  | 7.6    | 5.55  | 0.08 | 5.24 | 2.06 | 4.82 | I    | I |
| O | 1425  | 9  | 2004-10-14 | 14:26:59  | 26.6  | 50     | 11.63 | 0.08 | 5.34 | 3.33 | 4.18 | I    | I |
| O | 1425  | 8  | 2004-09-15 | 01:44:55  | 32.4  | -110.8 | 11.25 | 0.07 | 5.34 | 4.45 | 2.94 | I    | I |
| O | 1422  | 12 | 2002-02-12 | 17:58:12  | -33.9 | 18.4   | 10.27 | 0.07 | 5.39 | 5.24 | 1.26 | I    | I |
| O | 1422  | 9  | 2001-11-15 | 17:44:33  | -33.9 | 18.4   | 11.06 | 0.08 | 5.52 | 3.36 | 4.38 | I    | I |
| O | 1422  | 12 | 2002-02-12 | 16:30:00  | 43.9  | 18.4   | 8.8   | 0.08 | 5.58 | 0.85 | 5.51 | I    | I |
| O | 1425  | 4  | 2004-05-19 | 18:56:10  | 32.5  | 3.7    | 14.05 | 0.08 | 5.62 | 5.59 | 0.62 | I    | I |
| S | 1409  | 11 | 1989-06-04 | 05:13:06  | 19.8  | -155.5 | 9.32  | 0.09 | 5.88 | 5.1  | 2.93 | I    | I |
| O | 1425  | 9  | 2004-10-14 | 15:22:41  | 30.4  | 35.5   | 12.56 | 0.09 | 5.9  | 3.32 | 4.88 | I    | I |
| O | 1420  | 8  | 1999-11-08 | 14:57:11  | 32    | 35.9   | 11.05 | 0.09 | 5.9  | 5.87 | 0.63 | I    | I |
| O | 1420  | 8  | 1999-11-08 | 15:02:16  | 31.8  | 34.7   | 11.14 | 0.09 | 5.93 | 5.89 | 0.63 | I    | I |
| S | 1276  | 7  | 23-01-1860 | 15:55:03  | 38    | 23.7   | 15.63 | 0.09 | 6.07 | 5.25 | 3.04 | I    | I |
| O | 1423  | 1  | 2002-03-14 | 13:31:21  | 4.1   | 73.3   | 11.46 | 0.09 | 6.12 | 5.43 | 2.83 | I    | I |
| S | 1288  | 4  | 18-06-1871 | 18:09:03  | 38    | 23.7   | 15.66 | 0.09 | 6.21 | 4.32 | 4.46 | I    | I |
| O | 1424  | 8  | 2003-09-26 | 14:46:49  | 26.6  | 50     | 11.61 | 0.11 | 6.25 | 5.63 | 2.72 | I    | I |
| O | 1421  | 9  | 2000-11-26 | 13:44:21  | 32.6  | 51.7   | 14.53 | 0.1  | 6.43 | 5.88 | 2.59 | I    | I |
| S | 1408  | 9  | 1988-04-17 | 00:29:04  | 37.2  | -84.1  | 12.47 | 0.11 | 6.48 | 6.38 | 1.11 | I    | I |
| O | 1425  | 9  | 2004-10-14 | 17:14:52  | -33.9 | 18.4   | 14.43 | 0.11 | 6.56 | 6.28 | 1.92 | I(B) | I |
| O | 1420  | 4  | 1999-07-13 | 16:10:57  | -33.9 | 18.4   | 13.77 | 0.12 | 6.7  | 6.34 | 2.19 | I    | I |
| O | 1424  | 9  | 2003-10-26 | 01:30:19  | 44.6  | -123.1 | 12.65 | 0.12 | 6.71 | 2.95 | 6.03 | I    | I |
| O | 1424  | 8  | 2003-09-26 | 15:45:00  | 30.4  | 35.5   | 12.58 | 0.12 | 6.77 | 5.74 | 3.6  | I    | I |
| O | 1423  | 1  | 2002-03-14 | 15:00:13  | 26.2  | 50.5   | 12.94 | 0.11 | 6.79 | 4.57 | 5.03 | I    | I |
| O | 1423  | 1  | 2002-03-14 | 15:02:11  | 26.6  | 50     | 12.98 | 0.11 | 6.81 | 4.55 | 5.07 | I    | I |
| O | 1420  | 10 | 2000-01-07 | 11:41:45  | 23.7  | 90.4   | 17.45 | 0.11 | 6.86 | 6.7  | 1.45 | I    | I |
| O | 1425  | 7  | 2004-08-16 | 15:07:12  | 30.2  | 57.1   | 13.71 | 0.12 | 6.87 | 6.49 | 2.28 | I    | I |
| O | 1421  | 9  | 2000-11-26 | 14:48:43  | 32    | 35.9   | 15.6  | 0.12 | 6.89 | 6.26 | 2.88 | I    | I |
| O | 1425  | 9  | 2004-10-14 | 17:44:38  | 6.5   | 3.4    | 14.92 | 0.13 | 6.91 | 6    | 3.42 | I    | I |
| O | 1420  | 4  | 1999-07-13 | 16:01:24  | 24.6  | 46.5   | 13.61 | 0.13 | 6.92 | 4.22 | 5.49 | I    | I |
| O | 1425  | 7  | 2004-08-16 | 15:30:22  | 26.6  | 50     | 14.09 | 0.12 | 7.01 | 6.74 | 1.93 | I    | I |
| O | 1416  | 8  | 1995-12-22 | 13:44:18  | 36.1  | 50.7   | 11.35 | 0.14 | 7.02 | 7.01 | 0.31 | I    | I |
| O | 1421  | 2  | 2000-05-04 | 16:18:24  | -33.9 | 18.4   | 12.09 | 0.13 | 7.05 | 6.64 | 2.38 | I    | I |
| O | 1420  | 9  | 1999-12-08 | 15:13:01  | 26.2  | 32.7   | 16.67 | 0.12 | 7.11 | 7.01 | 1.18 | I(T) | I |
| O | 1425  | 7  | 2004-08-16 | 15:39:23  | 35.7  | 51.3   | 14.24 | 0.13 | 7.12 | 6.35 | 3.23 | I    | I |

|   |      |    |            |          |       |       |       |      |       |      |      |      |   |
|---|------|----|------------|----------|-------|-------|-------|------|-------|------|------|------|---|
| S | 1405 | 1  | 1984-09-25 | 15:44:29 | 15.6  | 35.6  | 12.55 | 0.14 | 7.14  | 6.94 | 1.65 | I    | I |
| O | 1423 | 1  | 2002-03-14 | 16:00:02 | 30.4  | 35.5  | 13.94 | 0.12 | 7.16  | 4.63 | 5.47 | I    | I |
| O | 1421 | 9  | 2000-11-26 | 15:32:02 | -4    | 39.7  | 16.33 | 0.13 | 7.16  | 6.84 | 2.15 | I    | I |
| O | 1423 | 7  | 2002-09-07 | 14:45:23 | 31.1  | 56.5  | 11.57 | 0.14 | 7.21  | 6.73 | 2.58 | I    | I |
| O | 1422 | 6  | 2001-08-19 | 15:04:32 | 29.5  | 56.8  | 12.14 | 0.14 | 7.24  | 6.68 | 2.8  | I    | I |
| S | 1410 | 8  | 1990-02-25 | 23:41:13 | 35.6  | -83.5 | 14.77 | 0.14 | 7.26  | 7.25 | 0.53 | I(V) | I |
| O | 1420 | 9  | 1999-12-08 | 15:37:06 | -4    | 39.7  | 17.07 | 0.13 | 7.34  | 6.58 | 3.25 | I    | I |
| O | 1423 | 7  | 2002-09-07 | 15:07:16 | 32.5  | 51.3  | 11.93 | 0.15 | 7.4   | 6.79 | 2.94 | V    | I |
| S | 1416 | 9  | 1996-01-21 | 01:01:51 | 32.4  | -111  | 12.17 | 0.15 | 7.41  | 7.17 | 1.86 | I(V) | I |
| O | 1425 | 12 | 2005-01-10 | 23:03:19 | 26    | -80.3 | 10.99 | 0.15 | 7.44  | 3.62 | 6.5  | I    | I |
| O | 1424 | 8  | 2003-09-26 | 17:00:29 | -33.9 | 18.4  | 13.84 | 0.15 | 7.46  | 5.91 | 4.55 | I    | I |
| O | 1425 | 7  | 2004-08-16 | 16:33:33 | 30.2  | 35.5  | 15.14 | 0.14 | 7.46  | 6.9  | 2.83 | I    | I |
| O | 1425 | 7  | 2004-08-16 | 16:34:44 | 32    | 35.9  | 15.16 | 0.14 | 7.48  | 6.81 | 3.09 | I(T) | I |
| O | 1422 | 9  | 2001-11-15 | 21:55:12 | 41.1  | -74   | 15.23 | 0.15 | 7.49  | 5.25 | 5.35 | I    | I |
| O | 1425 | 2  | 2004-03-21 | 15:05:59 | 26.6  | 50    | 16.39 | 0.14 | 7.49  | 6.82 | 3.11 | I(B) | I |
| O | 1422 | 6  | 2001-08-19 | 15:30:53 | 32.5  | 51.3  | 12.58 | 0.15 | 7.5   | 6.68 | 3.41 | V    | I |
| O | 1424 | 1  | 2003-03-03 | 17:36:15 | -33.9 | 18.4  | 15    | 0.14 | 7.5   | 6.75 | 3.27 | I    | I |
| O | 1422 | 10 | 2001-12-15 | 13:45:44 | 32.6  | 51.7  | 16.95 | 0.14 | 7.54  | 5.43 | 5.24 | V    | I |
| O | 1425 | 2  | 2004-03-21 | 15:14:36 | 29.4  | 48    | 16.54 | 0.14 | 7.58  | 6.73 | 3.49 | I(T) | I |
| O | 1421 | 8  | 2000-10-27 | 22:30:39 | 38.8  | -77.2 | 14.53 | 0.15 | 7.6   | 6.63 | 3.74 | I    | I |
| O | 1420 | 9  | 1999-12-08 | 16:19:39 | 36.8  | 10.4  | 17.78 | 0.14 | 7.61  | 6.95 | 3.1  | I(B) | I |
| S | 1405 | 8  | 1985-04-21 | 00:32:32 | 37.2  | -84.1 | 19.16 | 0.14 | 7.63  | 6.82 | 3.43 | I    | I |
| S | 1404 | 5  | 1984-02-02 | 15:49:11 | 15.6  | 35.6  | 16.03 | 0.14 | 7.64  | 6.32 | 4.31 | I    | I |
| O | 1418 | 12 | 1998-03-28 | 17:02:24 | -33.9 | 18.4  | 13.8  | 0.16 | 7.68  | 5.83 | 5.01 | I(B) | I |
| O | 1423 | 4  | 2002-06-11 | 16:59:33 | 31.9  | 35.8  | 17.2  | 0.15 | 7.68  | 6.71 | 3.75 | I    | I |
| O | 1425 | 7  | 2004-08-16 | 16:33:24 | -33.9 | 18.4  | 15.14 | 0.15 | 7.7   | 4.87 | 5.97 | I    | I |
| O | 1422 | 6  | 2001-08-19 | 15:53:23 | 38.6  | 48.2  | 12.95 | 0.16 | 7.76  | 6.37 | 4.44 | I(B) | I |
| O | 1421 | 9  | 2000-11-26 | 16:56:32 | 32.5  | 3.7   | 17.73 | 0.15 | 7.84  | 6.92 | 3.69 | I    | I |
| O | 1424 | 10 | 2003-11-24 | 13:14:26 | 32.9  | 59.2  | 14.24 | 0.17 | 7.85  | 3.57 | 7    | I    | I |
| O | 1423 | 1  | 2002-03-14 | 18:07:14 | 32.5  | 3.7   | 16.06 | 0.15 | 7.91  | 5.36 | 5.82 | I    | I |
| S | 1404 | 4  | 1984-01-03 | 22:48:55 | 37.2  | -84.1 | 17.54 | 0.16 | 8.02  | 4.22 | 6.83 | I    | I |
| S | 1280 | 12 | 06-05-1864 | 17:31:58 | 39.6  | 26.2  | 17.3  | 0.16 | 8.02  | 6.64 | 4.51 | I    | I |
| O | 1423 | 8  | 2002-10-07 | 01:17:20 | 32.4  | -111  | 13.98 | 0.18 | 8.03  | 6.67 | 4.48 | I    | I |
| O | 1422 | 10 | 2001-12-15 | 14:53:32 | 31.8  | 35.2  | 18.08 | 0.16 | 8.09  | 5.94 | 5.51 | I    | I |
| O | 1424 | 10 | 2003-11-24 | 13:45:01 | 32.6  | 51.7  | 14.75 | 0.18 | 8.14  | 3.8  | 7.2  | I    | I |
| S | 1405 | 3  | 1984-11-23 | 15:17:56 | 15.6  | 35.6  | 16.34 | 0.17 | 8.14  | 6.41 | 5.02 | I    | I |
| O | 1423 | 1  | 2002-03-14 | 19:07:25 | 27.7  | -11.3 | 17.06 | 0.16 | 8.21  | 6.27 | 5.31 | I    | I |
| S | 1407 | 11 | 1987-06-26 | 22:09:22 | -30.1 | -71   | 16.53 | 0.17 | 8.41  | 3.24 | 7.77 | I    | I |
| O | 1422 | 12 | 2002-02-13 | 01:22:49 | 32.4  | -111  | 17.68 | 0.17 | 8.44  | 5.78 | 6.16 | I    | I |
| O | 1425 | 2  | 2004-03-21 | 17:11:09 | -33.9 | 18.4  | 18.48 | 0.18 | 8.62  | 6.13 | 6.08 | I    | I |
| O | 1420 | 9  | 1999-12-08 | 18:05:42 | -33.9 | 18.4  | 19.55 | 0.18 | 8.65  | 4.56 | 7.36 | I    | I |
| O | 1423 | 9  | 2002-11-05 | 13:40:48 | 29.9  | 56.2  | 17.09 | 0.22 | 9.06  | 6.63 | 6.2  | I(B) | I |
| O | 1423 | 11 | 2003-01-03 | 13:56:44 | 32    | 51.9  | 17.55 | 0.21 | 9.11  | 5.49 | 7.28 | I    | I |
| O | 1420 | 12 | 2000-03-06 | 23:32:52 | 43.3  | -79.9 | 18.25 | 0.21 | 9.18  | 6.13 | 6.85 | I    | I |
| O | 1423 | 11 | 2003-01-03 | 14:16:11 | 26.6  | 49.8  | 17.87 | 0.21 | 9.2   | 6.36 | 6.66 | I    | I |
| O | 1425 | 5  | 2004-06-18 | 16:01:34 | -33.9 | 18.4  | 19.56 | 0.2  | 9.21  | 3.68 | 8.44 | I    | I |
| S | 1408 | 2  | 1987-09-23 | 23:48:20 | 37.2  | -84.1 | 20.65 | 0.22 | 9.39  | 3.29 | 8.8  | I    | I |
| O | 1425 | 11 | 2004-12-12 | 16:57:10 | 32.5  | 3.7   | 15.45 | 0.24 | 9.44  | 3.49 | 8.77 | I    | I |
| O | 1420 | 10 | 2000-01-07 | 18:04:47 | -32.3 | 20.8  | 23.83 | 0.24 | 10.03 | 6.33 | 7.8  | I(B) | I |
| O | 1425 | 9  | 2004-10-14 | 23:07:54 | 25.8  | -80.2 | 20.31 | 0.26 | 10.05 | 6.27 | 7.88 | I(T) | I |

|   |      |    |            |          |       |        |       |      |       |      |       |      |   |
|---|------|----|------------|----------|-------|--------|-------|------|-------|------|-------|------|---|
| O | 1420 | 10 | 2000-01-07 | 18:18:49 | -33.9 | 18.4   | 24.07 | 0.24 | 10.16 | 6.16 | 8.09  | I(B) | I |
| O | 1415 | 7  | 1994-12-03 | 18:01:39 | -33.9 | 18.4   | 18.11 | 0.28 | 10.22 | 6.33 | 8.04  | I    | I |
| S | 1290 | 11 | 20-12-1873 | 15:27:06 | 38    | 23.7   | 20.63 | 0.3  | 10.98 | 4.53 | 10.02 | I    | I |
| O | 1425 | 9  | 2004-10-15 | 01:07:31 | 32.2  | -111.1 | 22.3  | 0.32 | 11.23 | 5.91 | 9.57  | I    | I |
| O | 1425 | 9  | 2004-10-15 | 01:34:00 | 33.9  | -118   | 22.75 | 0.34 | 11.5  | 5.74 | 9.97  | I(T) | I |
| O | 1425 | 9  | 2004-10-15 | 01:34:41 | 34.1  | -118.2 | 22.76 | 0.34 | 11.51 | 5.71 | 10    | I(T) | I |
| S | 1407 | 5  | 1986-12-31 | 22:13:49 | 39    | -77    | 19.05 | 0.36 | 11.66 | 5.07 | 10.52 | I    | I |
| O | 1426 | 10 | 2005-11-03 | 00:48:44 | 32.2  | -111.1 | 23.39 | 0.34 | 11.77 | 4.11 | 11.04 | I(T) | I |
| O | 1425 | 9  | 2004-10-15 | 01:46:45 | 44.6  | -123.1 | 22.96 | 0.35 | 11.78 | 3.82 | 11.15 | I    | I |
| O | 1420 | 4  | 1999-07-14 | 01:19:56 | 43.3  | -79.9  | 22.92 | 0.39 | 12.27 | 4.97 | 11.24 | I    | I |
| O | 1425 | 10 | 2004-11-13 | 13:49:04 | 36.1  | 50.3   | 23.35 | 0.43 | 12.91 | 4.98 | 11.93 | V    | I |
| O | 1424 | 10 | 2003-11-25 | 00:26:29 | 47.6  | -117.5 | 25.44 | 0.56 | 14.66 | 4.22 | 14.05 | I(B) | I |
| O | 1415 | 10 | 1995-03-02 | 17:37:37 | -33.9 | 18.4   | 29.81 | 0.54 | 14.93 | 4.57 | 14.23 | I    | I |
| O | 1421 | 12 | 2001-02-24 | 17:23:11 | 51.7  | 7.2    | 33.02 | 0.53 | 15.07 | 9.77 | 11.53 | I    | I |
| S | 1278 | 2  | 07-08-1861 | 17:45:30 | 38    | 23.7   | 28.85 | 0.61 | 15.55 | 3.99 | 15.05 | I    | I |
| S | 1340 | 5  | 1921-12-30 | 18:17:42 | -33.9 | 18.5   | 36.64 | 0.69 | 17.25 | 8.29 | 15.18 | I    | I |
| S | 1282 | 2  | 24-06-1865 | 18:10:25 | 38    | 23.7   | 34.22 | 0.77 | 17.88 | 7.87 | 16.11 | I    | I |
| S | 1340 | 6  | 1922-01-29 | 18:10:38 | -33.9 | 18.5   | 42.37 | 0.81 | 18.9  | 8.06 | 17.16 | I    | I |
| S | 1278 | 4  | 05-10-1861 | 16:18:30 | 38    | 23.7   | 33.35 | 1    | 19.7  | 4.8  | 19.13 | I    | I |
| S | 1281 | 3  | 04-08-1864 | 17:48:35 | 38    | 23.7   | 51.24 | 1.22 | 23.26 | 7.68 | 22.03 | I    | I |
| O | 1419 | 9  | 1998-12-19 | 14:52:22 | 31.9  | 35.8   | 16.15 | 0.13 | 7.38  | 7.29 | 1.1   | I    | P |
| S | 1416 | 9  | 1996-01-21 | 01:09:55 | 32.8  | -113.2 | 12.31 | 0.15 | 7.47  | 7.26 | 1.77  | I(V) | P |
| S | 1416 | 9  | 1996-01-21 | 01:27:52 | 34.1  | -118.3 | 12.61 | 0.16 | 7.61  | 7.46 | 1.5   | I(V) | P |
| S | 1410 | 11 | 1990-05-25 | 00:56:22 | 35.6  | -83.5  | 13.14 | 0.16 | 7.63  | 7.63 | 0.13  | I(V) | P |
| S | 1278 | 11 | 29-04-1862 | 17:30:48 | 38    | 23.7   | 18.06 | 0.14 | 7.7   | 7.7  | 0.15  | I    | P |
| S | 1415 | 8  | 1995-01-02 | 00:25:01 | 33    | -106   | 13.47 | 0.16 | 7.76  | 7.75 | 0.23  | I(V) | P |
| S | 1409 | 10 | 1989-05-06 | 01:03:08 | 42.7  | -84.8  | 13.26 | 0.17 | 7.9   | 7.89 | 0.46  | I(V) | P |
| O | 1420 | 10 | 2000-01-07 | 13:56:31 | 32.7  | 52.3   | 19.7  | 0.15 | 7.92  | 7.22 | 3.26  | I(T) | P |
| S | 1409 | 10 | 1989-05-06 | 01:07:34 | 43    | -85.7  | 13.34 | 0.17 | 7.94  | 7.93 | 0.39  | I(V) | P |
| O | 1425 | 2  | 2004-03-21 | 16:04:51 | 30.4  | 35.5   | 17.37 | 0.16 | 7.96  | 7.08 | 3.64  | I(B) | P |
| O | 1422 | 1  | 2001-03-25 | 17:06:05 | -33.9 | 18.4   | 15.73 | 0.16 | 7.97  | 7.16 | 3.5   | V    | P |
| O | 1422 | 6  | 2001-08-19 | 16:30:39 | 30.2  | 35.5   | 13.57 | 0.18 | 8.02  | 7.21 | 3.53  | I    | P |
| S | 1339 | 6  | 1921-02-08 | 18:14:16 | 36.5  | -6.2   | 17.62 | 0.16 | 8.1   | 7.94 | 1.61  | I    | P |
| S | 1404 | 2  | 1983-11-05 | 15:20:31 | 15.6  | 35.6   | 16.98 | 0.17 | 8.11  | 7.56 | 2.95  | I    | P |
| S | 1409 | 10 | 1989-05-06 | 01:24:12 | 30.3  | -97    | 13.61 | 0.18 | 8.12  | 7.73 | 2.48  | I(V) | P |
| O | 1420 | 9  | 1999-12-08 | 17:44:43 | 6.5   | 3.4    | 19.2  | 0.16 | 8.13  | 7.99 | 1.49  | I    | P |
| O | 1421 | 9  | 2000-11-26 | 17:35:31 | 34    | -6.8   | 18.38 | 0.16 | 8.14  | 7.01 | 4.14  | I(T) | P |
| S | 1408 | 11 | 1988-06-15 | 01:16:44 | 37.2  | -84.1  | 16.03 | 0.16 | 8.14  | 8    | 1.49  | I    | P |
| S | 1339 | 6  | 1921-02-08 | 18:22:34 | 38.8  | -9.1   | 17.76 | 0.16 | 8.15  | 8.06 | 1.21  | I    | P |
| O | 1422 | 10 | 2001-12-15 | 15:40:50 | -4    | 39.7   | 18.87 | 0.17 | 8.26  | 8.26 | 0     | I    | P |
| O | 1424 | 4  | 2003-06-01 | 00:24:00 | 26    | -80.3  | 20.05 | 0.16 | 8.27  | 8.1  | 1.69  | I(B) | P |
| O | 1421 | 5  | 2000-07-31 | 18:18:12 | 6.5   | 3.4    | 15.87 | 0.18 | 8.28  | 8.1  | 1.68  | V    | P |
| O | 1421 | 10 | 2000-12-26 | 13:54:28 | 29.6  | 52.5   | 20.53 | 0.16 | 8.32  | 7.17 | 4.22  | I(T) | P |
| S | 1392 | 2  | 1972-03-16 | 02:13:49 | 35.5  | -117.6 | 14.64 | 0.19 | 8.36  | 7.99 | 2.48  | V(F) | P |
| O | 1421 | 4  | 2000-07-02 | 11:35:47 | 2.3   | 102.4  | 16.25 | 0.19 | 8.38  | 8.18 | 1.8   | I(B) | P |
| O | 1425 | 2  | 2004-03-21 | 16:54:16 | 38    | 23.7   | 18.2  | 0.17 | 8.39  | 6.93 | 4.74  | I(T) | P |
| O | 1421 | 10 | 2000-12-26 | 14:10:38 | 26.6  | 50     | 20.8  | 0.17 | 8.41  | 7.5  | 3.82  | I(B) | P |
| S | 1410 | 11 | 1990-05-25 | 02:34:02 | 31.6  | -110.5 | 14.77 | 0.19 | 8.47  | 8.47 | 0.11  | I(V) | P |
| O | 1410 | 11 | 1990-05-25 | 02:38:01 | 32.4  | -111   | 14.83 | 0.2  | 8.5   | 8.5  | 0.06  | V    | P |
| S | 1409 | 10 | 1989-05-06 | 02:18:11 | 39.7  | -105.5 | 14.51 | 0.19 | 8.53  | 8.5  | 0.67  | I(V) | P |

|   |      |    |            |          |       |        |       |      |      |      |      |      |   |
|---|------|----|------------|----------|-------|--------|-------|------|------|------|------|------|---|
| O | 1415 | 9  | 1995-01-31 | 14:17:18 | 35.6  | 51.3   | 15.48 | 0.19 | 8.57 | 8.4  | 1.68 | V    | P |
| O | 1424 | 2  | 2003-04-02 | 15:09:01 | 32.6  | 51.6   | 19.82 | 0.17 | 8.58 | 7.23 | 4.64 | V    | P |
| O | 1422 | 8  | 2001-10-17 | 11:10:26 | 2.3   | 102.4  | 15.77 | 0.2  | 8.63 | 8.62 | 0.33 | V    | P |
| O | 1425 | 5  | 2004-06-18 | 15:51:29 | 26.6  | 50     | 19.39 | 0.18 | 8.64 | 8.61 | 0.72 | I    | P |
| O | 1425 | 5  | 2004-06-18 | 16:00:42 | 24.6  | 46.5   | 19.55 | 0.18 | 8.7  | 8.69 | 0.37 | I(T) | P |
| O | 1425 | 5  | 2004-06-18 | 16:04:00 | 28.4  | 48     | 19.6  | 0.18 | 8.73 | 8.66 | 1.11 | I(T) | P |
| O | 1420 | 10 | 2000-01-07 | 15:51:16 | -4    | 39.7   | 21.61 | 0.18 | 8.76 | 8.3  | 2.79 | I(B) | P |
| S | 1340 | 3  | 1921-10-31 | 17:28:54 | -33.9 | 18.5   | 17.83 | 0.2  | 8.77 | 7.11 | 5.14 | I    | P |
| O | 1425 | 5  | 2004-06-18 | 16:09:25 | 33.3  | 50     | 19.69 | 0.18 | 8.78 | 8.54 | 2.07 | V    | P |
| O | 1420 | 6  | 1999-09-10 | 16:05:20 | 30.4  | 35.5   | 18.03 | 0.19 | 8.79 | 7.18 | 5.09 | I(T) | P |
| O | 1421 | 10 | 2000-12-26 | 14:54:22 | 32.6  | 35.9   | 21.53 | 0.18 | 8.8  | 7.28 | 4.95 | V    | P |
| S | 1410 | 11 | 1990-05-25 | 03:11:04 | 34.2  | -118.1 | 15.38 | 0.21 | 8.8  | 8.78 | 0.56 | I(V) | P |
| O | 1423 | 2  | 2002-04-13 | 15:10:14 | 29.6  | 52.5   | 19.8  | 0.19 | 8.83 | 7.32 | 4.96 | I(B) | P |
| O | 1421 | 10 | 2000-12-26 | 15:01:13 | 30.2  | 35.5   | 21.64 | 0.18 | 8.83 | 7.54 | 4.6  | I(B) | P |
| O | 1420 | 6  | 1999-09-10 | 16:09:28 | 31.8  | 34.7   | 18.1  | 0.19 | 8.84 | 7.07 | 5.31 | I    | P |
| O | 1425 | 3  | 2004-04-20 | 10:39:48 | 5     | 114.9  | 21.29 | 0.19 | 8.88 | 8.55 | 2.39 | I    | P |
| O | 1423 | 2  | 2002-04-13 | 15:16:44 | 32.6  | 51.7   | 19.91 | 0.19 | 8.9  | 7.09 | 5.4  | V    | P |
| O | 1411 | 8  | 1991-02-15 | 13:07:13 | 33.4  | 73.1   | 19.57 | 0.2  | 8.94 | 8.9  | 0.88 | V    | P |
| S | 1332 | 1  | 1913-11-28 | 17:56:30 | -33.9 | 18.5   | 16.26 | 0.21 | 8.96 | 8.96 | 0.11 | V    | P |
| O | 1424 | 2  | 2003-04-02 | 16:11:49 | 30.2  | 35.5   | 20.87 | 0.19 | 8.99 | 7.89 | 4.33 | I(T) | P |
| O | 1424 | 3  | 2003-05-02 | 10:39:34 | 5     | 114.9  | 22.4  | 0.19 | 9    | 8.91 | 1.31 | I(B) | P |
| S | 1290 | 3  | 27-04-1873 | 17:29:11 | 38    | 23.7   | 18.78 | 0.21 | 9.05 | 8.02 | 4.19 | I    | P |
| O | 1425 | 4  | 2004-05-20 | 02:34:57 | 32.4  | -111   | 21.7  | 0.19 | 9.06 | 8.89 | 1.73 | I(B) | P |
| O | 1421 | 10 | 2000-12-26 | 15:46:25 | -4    | 39.7   | 22.39 | 0.19 | 9.06 | 8.94 | 1.45 | V    | P |
| S | 1399 | 3  | 1979-01-28 | 23:14:20 | 29.9  | -81.3  | 16.9  | 0.22 | 9.08 | 9.07 | 0.13 | V    | P |
| O | 1418 | 10 | 1998-01-29 | 00:11:12 | 29.8  | -95.4  | 18.15 | 0.22 | 9.12 | 9.09 | 0.71 | V    | P |
| S | 1399 | 3  | 1979-01-28 | 23:19:03 | 29.7  | -82.4  | 16.98 | 0.22 | 9.12 | 9.12 | 0.11 | V(F) | P |
| S | 1404 | 8  | 1984-05-02 | 00:43:06 | 37.2  | -84.1  | 20.95 | 0.2  | 9.15 | 7.7  | 4.94 | I    | P |
| O | 1425 | 5  | 2004-06-18 | 17:02:05 | 32    | 35.9   | 20.57 | 0.2  | 9.15 | 8.92 | 2.04 | V    | P |
| S | 1407 | 11 | 1987-06-27 | 01:19:20 | 37.2  | -84.1  | 19.69 | 0.2  | 9.18 | 8.71 | 2.89 | I(V) | P |
| O | 1423 | 6  | 2002-08-09 | 11:35:10 | 2.3   | 102.4  | 16.32 | 0.22 | 9.19 | 9.12 | 1.09 | I(T) | P |
| O | 1411 | 9  | 1991-03-17 | 01:47:29 | 32.4  | -111   | 17.6  | 0.21 | 9.2  | 8.64 | 3.16 | I    | P |
| O | 1423 | 9  | 2002-11-05 | 13:56:00 | 29.6  | 52.5   | 17.34 | 0.23 | 9.21 | 6.75 | 6.27 | I(B) | P |
| O | 1423 | 9  | 2002-11-05 | 13:56:56 | 30.1  | 52.1   | 17.36 | 0.23 | 9.22 | 6.7  | 6.35 | I(B) | P |
| O | 1425 | 11 | 2004-12-12 | 17:14:40 | 10.3  | 9.8    | 15.74 | 0.23 | 9.24 | 6.83 | 6.24 | I(B) | P |
| S | 1399 | 3  | 1979-01-28 | 23:35:22 | 38.7  | -90.3  | 17.25 | 0.23 | 9.29 | 9.11 | 1.86 | V(F) | P |
| S | 1399 | 3  | 1979-01-28 | 23:34:29 | 42    | -91.7  | 17.24 | 0.23 | 9.3  | 8.97 | 2.47 | V(F) | P |
| O | 1425 | 11 | 2004-12-12 | 17:21:55 | 11.2  | 7.6    | 15.86 | 0.23 | 9.32 | 6.8  | 6.39 | I(B) | P |
| S | 1407 | 11 | 1987-06-27 | 01:41:17 | 42.7  | -84.5  | 20.06 | 0.21 | 9.36 | 8.41 | 4.12 | V(F) | P |
| O | 1421 | 1  | 2000-04-05 | 11:29:30 | 5.3   | 102.9  | 17.27 | 0.23 | 9.36 | 9.14 | 2.05 | I(B) | P |
| S | 1399 | 3  | 1979-01-28 | 23:42:05 | 42    | -93.6  | 17.36 | 0.24 | 9.37 | 9.03 | 2.51 | V    | P |
| O | 1424 | 3  | 2003-05-02 | 11:30:21 | 3.2   | 101.7  | 23.24 | 0.21 | 9.39 | 9.22 | 1.75 | V    | P |
| S | 1407 | 11 | 1987-06-27 | 02:01:35 | 30    | -100   | 20.4  | 0.21 | 9.43 | 9.29 | 1.64 | I    | P |
| O | 1406 | 4  | 1985-12-12 | 17:55:12 | -32.4 | 20.8   | 17    | 0.24 | 9.46 | 9.23 | 2.05 | V    | P |
| S | 1393 | 6  | 1973-07-01 | 05:30:11 | -44   | 170.5  | 17.85 | 0.24 | 9.51 | 7.3  | 6.11 | I(V) | P |
| S | 1397 | 3  | 1977-02-18 | 23:27:50 | 42.7  | -83.6  | 19.84 | 0.22 | 9.51 | 9.5  | 0.4  | V(F) | P |
| O | 1422 | 5  | 2001-07-21 | 13:36:26 | 4.1   | 73.3   | 17.85 | 0.25 | 9.58 | 9.57 | 0.43 | V    | P |
| O | 1424 | 7  | 2003-08-28 | 11:29:42 | 5.3   | 102.9  | 18.04 | 0.24 | 9.61 | 9.6  | 0.31 | I(B) | P |
| O | 1418 | 6  | 1997-10-02 | 15:39:58 | 31.8  | 34.7   | 22.79 | 0.23 | 9.79 | 7.11 | 6.75 | I    | P |
| O | 1423 | 9  | 2002-11-05 | 14:59:42 | 31.9  | 35.8   | 18.4  | 0.26 | 9.85 | 6.85 | 7.09 | I(B) | P |

|   |      |    |            |          |       |        |       |      |       |       |       |      |   |
|---|------|----|------------|----------|-------|--------|-------|------|-------|-------|-------|------|---|
| O | 1424 | 12 | 2004-01-22 | 14:16:42 | 30    | 51.7   | 17.18 | 0.26 | 9.93  | 6.56  | 7.47  | I(B) | P |
| O | 1419 | 6  | 1998-09-21 | 15:52:36 | 31.8  | 35.2   | 22.84 | 0.24 | 10.02 | 7.55  | 6.62  | I    | P |
| O | 1418 | 1  | 1997-05-07 | 15:32:52 | 32.7  | 52.3   | 18.76 | 0.26 | 10.1  | 6.95  | 7.35  | I(T) | P |
| S | 1288 | 2  | 20-04-1871 | 17:21:54 | 38    | 23.7   | 22.3  | 0.24 | 10.17 | 7.35  | 7.05  | I    | P |
| O | 1418 | 1  | 1997-05-07 | 15:45:53 | 36    | 50.8   | 18.97 | 0.27 | 10.25 | 6.58  | 7.88  | I    | P |
| O | 1421 | 10 | 2000-12-26 | 18:02:58 | -32.4 | 20.8   | 24.67 | 0.25 | 10.3  | 7.59  | 6.99  | V    | P |
| O | 1421 | 10 | 2000-12-26 | 18:02:41 | -32.3 | 20.8   | 24.66 | 0.25 | 10.3  | 7.6   | 6.97  | V    | P |
| O | 1421 | 10 | 2000-12-26 | 18:16:56 | -33.9 | 18.4   | 24.9  | 0.26 | 10.42 | 7.46  | 7.3   | I(B) | P |
| O | 1418 | 1  | 1997-05-07 | 16:40:42 | 31.8  | 34.9   | 19.89 | 0.29 | 10.64 | 7.63  | 7.45  | I(B) | P |
| O | 1423 | 11 | 2003-01-03 | 17:08:33 | 32.5  | 3.7    | 20.74 | 0.29 | 10.7  | 6.85  | 8.25  | I    | P |
| S | 1408 | 6  | 1988-01-20 | 01:01:16 | 32.2  | -111   | 19.58 | 0.33 | 11.07 | 8.37  | 7.27  | I(V) | P |
| O | 1422 | 11 | 2002-01-14 | 14:08:00 | 29.6  | 52.5   | 24.64 | 0.29 | 11.1  | 8.69  | 6.93  | I(B) | P |
| O | 1421 | 4  | 2000-07-02 | 16:01:58 | 32.6  | 51.7   | 20.68 | 0.34 | 11.27 | 7.77  | 8.2   | I(T) | P |
| O | 1421 | 1  | 2000-04-05 | 15:11:17 | 32.6  | 51.7   | 20.97 | 0.33 | 11.34 | 9.01  | 6.91  | I(B) | P |
| O | 1421 | 7  | 2000-09-28 | 17:02:25 | -33.9 | 18.4   | 21.14 | 0.33 | 11.4  | 9.07  | 6.93  | V    | P |
| O | 1424 | 12 | 2004-01-22 | 17:24:24 | 32.5  | 3.7    | 20.31 | 0.34 | 11.5  | 7.83  | 8.44  | V    | P |
| O | 1425 | 8  | 2004-09-15 | 14:27:11 | 36.6  | 59     | 23.95 | 0.33 | 11.57 | 7.08  | 9.17  | I(B) | P |
| O | 1420 | 3  | 1999-06-14 | 15:47:37 | 29.6  | 52.5   | 20.73 | 0.36 | 11.66 | 7.54  | 8.91  | I(T) | P |
| O | 1424 | 7  | 2003-08-28 | 15:19:05 | 32.6  | 51.7   | 21.86 | 0.35 | 11.67 | 9.39  | 6.95  | I(B) | P |
| O | 1425 | 8  | 2004-09-15 | 14:56:17 | 26.2  | 50.5   | 24.44 | 0.34 | 11.69 | 8.75  | 7.79  | I(B) | P |
| O | 1425 | 8  | 2004-09-15 | 14:58:26 | 26.6  | 50     | 24.47 | 0.34 | 11.71 | 8.7   | 7.87  | I(B) | P |
| O | 1422 | 5  | 2001-07-21 | 16:57:31 | 31.9  | 35.8   | 21.2  | 0.36 | 11.72 | 9.39  | 7.05  | I(B) | P |
| O | 1422 | 5  | 2001-07-21 | 16:58:49 | 32.6  | 35.9   | 21.22 | 0.36 | 11.74 | 9.3   | 7.2   | V    | P |
| O | 1421 | 7  | 2000-09-28 | 17:48:37 | 32.5  | 3.7    | 21.91 | 0.35 | 11.75 | 9.66  | 6.73  | V    | P |
| O | 1417 | 6  | 1996-10-13 | 15:26:15 | 31.8  | 34.7   | 25.18 | 0.34 | 11.78 | 8.16  | 8.52  | I(T) | P |
| O | 1422 | 2  | 2001-04-24 | 15:25:07 | 32.6  | 51.7   | 23.97 | 0.34 | 11.8  | 9.61  | 6.88  | V    | P |
| O | 1425 | 8  | 2004-09-15 | 14:57:04 | 35.7  | 51.4   | 24.45 | 0.35 | 11.81 | 7.34  | 9.27  | I(B) | P |
| O | 1425 | 8  | 2004-09-15 | 14:58:32 | 34.7  | 50.9   | 24.47 | 0.35 | 11.81 | 7.51  | 9.14  | I    | P |
| O | 1420 | 3  | 1999-06-14 | 16:05:06 | 29.4  | 48     | 21.02 | 0.37 | 11.81 | 7.73  | 8.96  | I(B) | P |
| O | 1425 | 8  | 2004-09-15 | 15:01:01 | 33.3  | 50.1   | 24.52 | 0.35 | 11.81 | 7.74  | 8.95  | I(B) | P |
| O | 1425 | 8  | 2004-09-15 | 15:07:10 | 28.4  | 48     | 24.62 | 0.34 | 11.81 | 8.49  | 8.23  | I(T) | P |
| O | 1421 | 4  | 2000-07-02 | 17:00:46 | 30.4  | 35.5   | 21.66 | 0.37 | 11.82 | 8.6   | 8.14  | V    | P |
| S | 1289 | 8  | 03-10-1872 | 16:21:01 | 38    | 23.7   | 24.84 | 0.34 | 11.83 | 7.89  | 8.84  | I    | P |
| O | 1421 | 1  | 2000-04-05 | 16:14:00 | 32    | 35.9   | 22.02 | 0.36 | 11.85 | 9.64  | 6.92  | I(T) | P |
| O | 1424 | 3  | 2003-05-02 | 16:20:55 | -33.9 | 18.4   | 28.09 | 0.33 | 11.88 | 7.19  | 9.48  | I(T) | P |
| O | 1423 | 6  | 2002-08-09 | 16:28:13 | -34   | 18.4   | 21.2  | 0.37 | 12    | 9.02  | 7.94  | V    | P |
| O | 1421 | 11 | 2001-01-25 | 17:27:47 | 32.5  | 3.7    | 28.33 | 0.34 | 12.06 | 10.05 | 6.7   | I(B) | P |
| O | 1424 | 8  | 2003-09-27 | 01:30:37 | 32.4  | -111   | 22.34 | 0.38 | 12.07 | 8.48  | 8.62  | I(B) | P |
| S | 1340 | 8  | 1922-03-29 | 17:01:27 | -33.9 | 18.5   | 27.97 | 0.35 | 12.12 | 6.99  | 9.93  | I    | P |
| O | 1421 | 1  | 2000-04-05 | 16:51:06 | -33.9 | 18.4   | 22.63 | 0.38 | 12.16 | 9.83  | 7.19  | I(B) | P |
| O | 1424 | 7  | 2003-08-28 | 16:20:47 | 32.4  | 36.2   | 22.89 | 0.38 | 12.19 | 9.73  | 7.39  | I(B) | P |
| O | 1424 | 8  | 2003-09-27 | 01:34:52 | 41.8  | -111.8 | 22.41 | 0.39 | 12.23 | 6.98  | 10.07 | V    | P |
| O | 1422 | 2  | 2001-04-24 | 16:27:40 | 31.9  | 35.8   | 25.02 | 0.37 | 12.28 | 10.22 | 6.86  | I(B) | P |
| O | 1422 | 2  | 2001-04-24 | 16:28:21 | 32.6  | 35.9   | 25.03 | 0.37 | 12.29 | 10.13 | 7     | I(B) | P |
| S | 1303 | 3  | 07-12-1885 | 15:57:15 | 50.6  | 5.7    | 26.68 | 0.37 | 12.5  | 9.49  | 8.18  | V    | P |
| O | 1419 | 10 | 1999-01-18 | 18:16:34 | -33.9 | 18.4   | 26.49 | 0.39 | 12.52 | 6.77  | 10.56 | V    | P |
| O | 1419 | 7  | 1998-10-21 | 15:17:56 | 31.8  | 34.7   | 29.13 | 0.39 | 13.03 | 10.78 | 7.36  | I(B) | P |
| S | 1404 | 6  | 1984-03-03 | 23:48:45 | 37.2  | -84.1  | 29.28 | 0.4  | 13.13 | 10.57 | 7.83  | I(V) | P |
| S | 1288 | 3  | 20-05-1871 | 17:50:24 | 38    | 23.7   | 31.08 | 0.4  | 13.19 | 10.25 | 8.35  | I    | P |
| O | 1418 | 9  | 1997-12-30 | 18:18:00 | -33.9 | 18.4   | 25.34 | 0.45 | 13.32 | 6.12  | 11.86 | V    | P |

|   |      |    |            |          |       |        |       |      |       |       |       |      |   |
|---|------|----|------------|----------|-------|--------|-------|------|-------|-------|-------|------|---|
| O | 1425 | 10 | 2004-11-13 | 14:53:33 | 32    | 35.9   | 24.42 | 0.47 | 13.45 | 6.24  | 11.94 | I(B) | P |
| O | 1424 | 10 | 2003-11-25 | 00:20:42 | 41.5  | -112   | 25.34 | 0.55 | 14.49 | 5.78  | 13.32 | I    | P |
| S | 1404 | 3  | 1983-12-05 | 22:36:38 | 37.2  | -84.1  | 34.17 | 0.61 | 16.07 | 9.8   | 12.8  | I(V) | P |
| O | 1424 | 11 | 2003-12-24 | 15:52:25 | 49.6  | 8.7    | 30.14 | 0.78 | 17.45 | 6.27  | 16.32 | V    | P |
| O | 1411 | 3  | 1990-09-20 | 15:56:00 | 31.8  | 34.7   | 39.15 | 0.85 | 19.1  | 6.08  | 18.14 | I(B) | P |
| S | 1398 | 4  | 1978-03-09 | 22:32:30 | 45.1  | -64.2  | 19.92 | 0.23 | 9.51  | 8.9   | 3.35  | V    | V |
| O | 1420 | 10 | 2000-01-07 | 17:59:10 | 6.5   | 3.4    | 23.74 | 0.22 | 9.68  | 9.65  | 0.87  | V    | V |
| O | 1415 | 8  | 1995-01-02 | 04:09:13 | 19.8  | -155.5 | 17.21 | 0.25 | 9.7   | 9.5   | 1.97  | V    | V |
| O | 1420 | 10 | 2000-01-07 | 17:50:14 | 34    | -6.8   | 23.59 | 0.22 | 9.71  | 8.64  | 4.44  | V    | V |
| S | 1283 | 10 | 05-02-1867 | 16:09:25 | 38    | 23.7   | 21.89 | 0.23 | 9.73  | 9.6   | 1.58  | I    | V |
| S | 1282 | 9  | 17-01-1866 | 15:49:22 | 38    | 23.7   | 19.21 | 0.24 | 9.74  | 9.73  | 0.51  | I    | V |
| O | 1424 | 5  | 2003-06-30 | 15:38:29 | 33.7  | 58.4   | 20.98 | 0.23 | 9.75  | 8.94  | 3.9   | I(B) | V |
| S | 1416 | 2  | 1995-06-28 | 22:10:03 | -30.1 | -71    | 21.32 | 0.22 | 9.75  | 9.75  | 0.32  | V    | V |
| S | 1339 | 6  | 1921-02-08 | 22:25:23 | 42.3  | -71.1  | 21.81 | 0.23 | 9.78  | 9.78  | 0.17  | V    | V |
| S | 1404 | 6  | 1984-03-03 | 15:58:49 | 15.6  | 35.6   | 21.45 | 0.22 | 9.79  | 9.13  | 3.53  | I    | V |
| S | 1398 | 4  | 1978-03-09 | 23:08:09 | 41.3  | -72.9  | 20.52 | 0.24 | 9.8   | 9.39  | 2.81  | V    | V |
| S | 1407 | 11 | 1987-06-27 | 02:52:00 | 39.8  | -105   | 21.24 | 0.23 | 9.82  | 9     | 3.94  | I    | V |
| S | 1398 | 4  | 1978-03-09 | 23:11:27 | 42.7  | -73.8  | 20.57 | 0.25 | 9.84  | 9.35  | 3.08  | V    | V |
| S | 1407 | 11 | 1987-06-27 | 02:59:47 | 33.5  | -112.1 | 21.37 | 0.23 | 9.84  | 9.48  | 2.65  | V    | V |
| O | 1418 | 10 | 1998-01-29 | 01:34:59 | 34.2  | -118.1 | 19.55 | 0.26 | 9.9   | 9.72  | 1.85  | V    | V |
| S | 1333 | 5  | 1915-03-16 | 17:49:35 | 49.4  | 8.7    | 22.12 | 0.24 | 9.93  | 9.8   | 1.61  | V    | V |
| O | 1418 | 3  | 1997-07-05 | 16:06:39 | -33.9 | 18.5   | 21.43 | 0.24 | 10.03 | 9.95  | 1.28  | V    | V |
| S | 1407 | 11 | 1987-06-27 | 03:22:57 | 40.7  | -111.9 | 21.75 | 0.24 | 10.04 | 9.08  | 4.31  | V(F) | V |
| O | 1425 | 5  | 2004-06-18 | 19:12:20 | 32.5  | 3.7    | 22.74 | 0.24 | 10.08 | 9.72  | 2.69  | I(T) | V |
| O | 1424 | 10 | 2003-11-24 | 17:40:25 | 6.5   | 3.4    | 18.67 | 0.27 | 10.09 | 8.75  | 5.04  | I(B) | V |
| S | 1407 | 11 | 1987-06-27 | 03:50:16 | 37    | -122   | 22.21 | 0.24 | 10.2  | 9.53  | 3.67  | V    | V |
| O | 1418 | 1  | 1997-05-07 | 16:16:02 | -33.9 | 18.4   | 19.48 | 0.27 | 10.3  | 8.93  | 5.16  | V    | V |
| O | 1422 | 8  | 2001-10-17 | 14:12:22 | 29.6  | 52.5   | 18.8  | 0.28 | 10.31 | 8.73  | 5.51  | I(B) | V |
| S | 1289 | 5  | 06-07-1872 | 18:09:25 | 38    | 23.7   | 23.74 | 0.25 | 10.33 | 8.52  | 5.87  | I    | V |
| O | 1422 | 8  | 2001-10-17 | 14:13:27 | 32.6  | 51.7   | 18.82 | 0.28 | 10.35 | 8.43  | 6.02  | I(B) | V |
| S | 1398 | 4  | 1978-03-10 | 00:12:46 | 40.5  | -89    | 21.6  | 0.27 | 10.37 | 9.96  | 2.89  | V    | V |
| O | 1423 | 3  | 2002-05-13 | 10:40:18 | 5     | 114.9  | 23.9  | 0.26 | 10.37 | 10.36 | 0.36  | I(B) | V |
| S | 1399 | 3  | 1979-01-29 | 01:24:21 | 47.6  | -122.3 | 19.07 | 0.29 | 10.38 | 9.51  | 4.18  | V(F) | V |
| O | 1422 | 8  | 2001-10-17 | 14:24:24 | 26.6  | 50     | 19    | 0.28 | 10.39 | 9.07  | 5.08  | V    | V |
| S | 1407 | 9  | 1987-04-29 | 00:12:43 | 26.7  | -81.8  | 22.63 | 0.26 | 10.39 | 10.32 | 1.22  | V(F) | V |
| S | 1407 | 9  | 1987-04-29 | 00:15:01 | 38.9  | -77.1  | 22.66 | 0.26 | 10.41 | 10.32 | 1.34  | V(F) | V |
| O | 1419 | 10 | 1999-01-18 | 14:51:12 | 26.1  | 44     | 23.07 | 0.27 | 10.42 | 10.26 | 1.81  | V    | V |
| O | 1419 | 10 | 1999-01-18 | 14:52:24 | 26.1  | 43.7   | 23.09 | 0.27 | 10.43 | 10.27 | 1.81  | I(B) | V |
| S | 1407 | 9  | 1987-04-29 | 00:17:27 | 28    | -82.5  | 22.7  | 0.26 | 10.43 | 10.38 | 0.95  | I    | V |
| O | 1425 | 10 | 2004-11-13 | 10:15:35 | 4.9   | 114.8  | 19.79 | 0.29 | 10.47 | 8.58  | 6.04  | I(B) | V |
| O | 1422 | 8  | 2001-10-17 | 14:39:43 | 24.6  | 46.5   | 19.26 | 0.29 | 10.5  | 9.34  | 4.83  | I(B) | V |
| S | 1298 | 5  | 30-03-1881 | 19:01:11 | 51.5  | -2.6   | 20.48 | 0.28 | 10.51 | 10.41 | 1.44  | V    | V |
| S | 1407 | 9  | 1987-04-29 | 00:28:05 | 36.2  | -81.7  | 22.88 | 0.27 | 10.51 | 10.48 | 0.8   | V(F) | V |
| S | 1398 | 4  | 1978-03-10 | 00:30:57 | 41.6  | -93.6  | 21.9  | 0.28 | 10.53 | 10.05 | 3.16  | V    | V |
| S | 1399 | 3  | 1979-01-29 | 01:45:32 | 37.8  | -122.4 | 19.42 | 0.3  | 10.53 | 10.28 | 2.29  | V(F) | V |
| S | 1398 | 2  | 1978-01-09 | 22:21:38 | 38.9  | -76.9  | 18.35 | 0.3  | 10.54 | 10.39 | 1.78  | V(F) | V |
| S | 1407 | 9  | 1987-04-29 | 00:34:20 | 33.7  | -84.4  | 22.99 | 0.27 | 10.56 | 10.55 | 0.28  | I    | V |
| O | 1423 | 2  | 2002-04-13 | 19:20:07 | 30.5  | -9.7   | 23.96 | 0.26 | 10.57 | 9.14  | 5.33  | I(T) | V |
| O | 1421 | 11 | 2001-01-25 | 14:17:18 | 29.6  | 52.5   | 25.16 | 0.26 | 10.63 | 9.05  | 5.6   | V    | V |
| O | 1421 | 11 | 2001-01-25 | 14:15:30 | 32.6  | 51.7   | 25.13 | 0.26 | 10.64 | 8.71  | 6.13  | V    | V |

|   |      |    |            |          |       |        |       |      |       |       |      |      |   |
|---|------|----|------------|----------|-------|--------|-------|------|-------|-------|------|------|---|
| S | 1407 | 9  | 1987-04-29 | 00:45:07 | 33    | -87.4  | 23.17 | 0.27 | 10.64 | 10.64 | 0.15 | I    | V |
| S | 1390 | 2  | 1970-04-07 | 00:43:21 | 44.5  | -88    | 20.55 | 0.29 | 10.65 | 10.61 | 0.9  | V(F) | V |
| O | 1425 | 3  | 2004-04-20 | 14:32:28 | 27.3  | 62.4   | 25.17 | 0.27 | 10.67 | 10.55 | 1.58 | I(B) | V |
| S | 1338 | 8  | 1920-04-19 | 18:37:46 | 43.5  | 7      | 20.91 | 0.3  | 10.68 | 9.67  | 4.55 | V    | V |
| S | 1407 | 9  | 1987-04-29 | 00:50:58 | 30    | -90.1  | 23.26 | 0.28 | 10.69 | 10.68 | 0.49 | V    | V |
| S | 1398 | 2  | 1978-01-09 | 22:40:01 | 36    | -79.8  | 18.66 | 0.3  | 10.7  | 10.63 | 1.23 | V    | V |
| S | 1407 | 9  | 1987-04-29 | 00:53:03 | 42.7  | -84.5  | 23.3  | 0.28 | 10.73 | 10.49 | 2.26 | V    | V |
| O | 1421 | 7  | 2000-09-28 | 15:52:56 | 26.2  | 32.7   | 19.98 | 0.29 | 10.74 | 9.63  | 4.77 | V    | V |
| S | 1398 | 2  | 1978-01-09 | 22:49:37 | 34    | -81.1  | 18.82 | 0.31 | 10.78 | 10.75 | 0.83 | V(F) | V |
| S | 1407 | 9  | 1987-04-29 | 01:01:30 | 40.8  | -87.7  | 23.44 | 0.28 | 10.79 | 10.62 | 1.88 | I    | V |
| O | 1422 | 8  | 2001-10-17 | 15:25:26 | -4    | 39.7   | 20.02 | 0.3  | 10.8  | 10.78 | 0.62 | V    | V |
| O | 1421 | 11 | 2001-01-25 | 14:49:07 | 24.6  | 46.5   | 25.69 | 0.27 | 10.82 | 9.75  | 4.72 | I(B) | V |
| O | 1419 | 12 | 1999-03-18 | 14:55:32 | 29.6  | 52.2   | 20.11 | 0.31 | 10.84 | 9.67  | 4.9  | V    | V |
| S | 1398 | 2  | 1978-01-09 | 22:58:52 | 29.9  | -81.3  | 18.97 | 0.31 | 10.86 | 10.86 | 0.05 | V    | V |
| S | 1398 | 2  | 1978-01-09 | 22:56:50 | 41.9  | -87.6  | 18.94 | 0.31 | 10.87 | 10.55 | 2.65 | V    | V |
| O | 1422 | 8  | 2001-10-17 | 15:17:30 | 31.9  | 35.8   | 19.89 | 0.31 | 10.9  | 8.84  | 6.4  | I(T) | V |
| S | 1398 | 2  | 1978-01-09 | 23:02:38 | 33.9  | -84.3  | 19.04 | 0.32 | 10.9  | 10.87 | 0.87 | V(F) | V |
| S | 1404 | 9  | 1984-05-31 | 16:19:18 | 15.6  | 35.6   | 23.51 | 0.3  | 10.91 | 10.88 | 0.71 | I    | V |
| S | 1398 | 2  | 1978-01-09 | 23:02:40 | 43    | -89.8  | 19.04 | 0.32 | 10.93 | 10.54 | 2.93 | V(F) | V |
| S | 1407 | 9  | 1987-04-29 | 01:21:51 | 30.3  | -97.7  | 23.78 | 0.29 | 10.94 | 10.93 | 0.38 | V    | V |
| O | 1419 | 12 | 1999-03-18 | 15:01:54 | 36    | 50.8   | 20.21 | 0.31 | 10.95 | 9.13  | 6.07 | V    | V |
| S | 1398 | 2  | 1978-01-09 | 23:08:44 | 27.7  | -82.7  | 19.14 | 0.32 | 10.95 | 10.94 | 0.51 | V(F) | V |
| S | 1339 | 6  | 1921-02-09 | 01:15:29 | 32.2  | -110   | 24.64 | 0.28 | 10.98 | 10.89 | 1.43 | V    | V |
| S | 1339 | 6  | 1921-02-09 | 01:18:21 | 35.2  | -111.7 | 24.69 | 0.28 | 10.99 | 10.97 | 0.78 | V    | V |
| S | 1407 | 9  | 1987-04-29 | 01:27:19 | 41.6  | -93.7  | 23.87 | 0.29 | 11    | 10.79 | 2.13 | I    | V |
| O | 1419 | 12 | 1999-03-18 | 15:17:57 | 24.6  | 46.5   | 20.48 | 0.32 | 11.01 | 10.27 | 3.98 | V    | V |
| O | 1424 | 3  | 2003-05-02 | 15:11:39 | 27.7  | 54.4   | 26.93 | 0.29 | 11.06 | 10.65 | 3.01 | I(T) | V |
| O | 1421 | 4  | 2000-07-02 | 15:59:34 | -32.4 | 20.8   | 20.64 | 0.33 | 11.09 | 9.55  | 5.66 | V    | V |
| O | 1423 | 11 | 2003-01-03 | 18:18:39 | -33.9 | 18.4   | 21.91 | 0.31 | 11.09 | 9.7   | 5.4  | V    | V |
| O | 1425 | 3  | 2004-04-20 | 15:25:25 | 32.8  | 51     | 26.05 | 0.29 | 11.09 | 10.74 | 2.78 | V    | V |
| S | 1398 | 2  | 1978-01-09 | 23:21:39 | 41.6  | -93.6  | 19.35 | 0.33 | 11.09 | 10.76 | 2.72 | V    | V |
| S | 1340 | 10 | 1922-05-27 | 16:03:30 | -33.9 | 18.5   | 21.99 | 0.31 | 11.1  | 10.17 | 4.48 | V    | V |
| O | 1423 | 7  | 2002-09-07 | 22:24:44 | 10.7  | -61.5  | 19.23 | 0.33 | 11.1  | 10.88 | 2.22 | V    | V |
| O | 1422 | 5  | 2001-07-21 | 15:55:38 | 32.6  | 51.7   | 20.17 | 0.33 | 11.12 | 8.85  | 6.77 | V    | V |
| O | 1423 | 9  | 2002-11-05 | 17:34:22 | -33.9 | 18.4   | 20.98 | 0.33 | 11.14 | 9.92  | 5.09 | V    | V |
| S | 1407 | 9  | 1987-04-29 | 01:47:33 | 30.6  | -104   | 24.21 | 0.3  | 11.14 | 11.14 | 0.28 | V(F) | V |
| O | 1420 | 7  | 1999-10-10 | 11:09:13 | 5.3   | 102.9  | 23.56 | 0.3  | 11.15 | 11.13 | 0.79 | V    | V |
| S | 1398 | 2  | 1978-01-09 | 23:32:29 | 30.9  | -90.2  | 19.53 | 0.33 | 11.16 | 11.16 | 0.31 | V(F) | V |
| S | 1390 | 4  | 1970-06-05 | 01:37:24 | 28    | -97    | 23.26 | 0.3  | 11.17 | 11.15 | 0.63 | V    | V |
| S | 1339 | 6  | 1921-02-09 | 01:44:54 | 34.2  | -118   | 25.13 | 0.29 | 11.18 | 11.14 | 0.93 | V(F) | V |
| S | 1390 | 4  | 1970-06-05 | 01:38:10 | 26.3  | -98.2  | 23.27 | 0.3  | 11.18 | 11.17 | 0.23 | V    | V |
| S | 1398 | 2  | 1978-01-09 | 23:34:17 | 30    | -90.2  | 19.56 | 0.33 | 11.18 | 11.18 | 0.11 | V    | V |
| O | 1420 | 11 | 2000-02-06 | 14:20:34 | 36.2  | 51.7   | 25.27 | 0.3  | 11.19 | 9.52  | 5.91 | V    | V |
| O | 1418 | 9  | 1997-12-30 | 15:02:25 | 31.3  | 35.2   | 22.08 | 0.32 | 11.2  | 11.02 | 2.05 | V    | V |
| O | 1418 | 9  | 1997-12-30 | 15:04:50 | 31.3  | 34.6   | 22.12 | 0.32 | 11.22 | 11.03 | 2.06 | I(B) | V |
| O | 1424 | 3  | 2003-05-02 | 15:30:54 | 32.6  | 51.7   | 27.25 | 0.29 | 11.23 | 10.47 | 4.08 | V    | V |
| O | 1422 | 11 | 2002-01-14 | 14:41:03 | 24.6  | 46.5   | 25.19 | 0.3  | 11.3  | 9.54  | 6.09 | I(B) | V |
| S | 1361 | 12 | 1942-12-08 | 21:47:31 | 40.7  | -74    | 19.8  | 0.34 | 11.32 | 9.78  | 5.74 | V(F) | V |
| S | 1410 | 10 | 1990-04-26 | 00:04:08 | 41.6  | -73.7  | 19.6  | 0.35 | 11.42 | 11.41 | 0.38 | I(V) | V |
| O | 1424 | 5  | 2003-06-30 | 19:13:50 | 32.5  | 3.7    | 24.57 | 0.31 | 11.43 | 10.42 | 4.73 | I(T) | V |

[illegible]
